# Supplementary material for: Investigation of the JASMONATE ZIM-DOMAIN Gene Family Reveals the Canonical JA-Signaling Pathway in Pineapple
Source: MDPI journal article supplement (doi:10.3390/biology11030445), 2022-03-15
Supplement: s1 [file s1]

# Supplementary Table and Figures

**Table S1.** The list of RT-PCR Primers.

| Gene           | Forward Primer (5'-3')                    | Reverse Primer (5'-3')                         | Function |
|----------------|-------------------------------------------|------------------------------------------------|----------|
| <i>AcJAZ1</i>  | CTTTGGACGTATGCTGCAGA                      | TCTGCAGCATACGTCCAAAG                           | RT-qPCR  |
| <i>AcJAZ2</i>  | TCGCAGCTCACAATCTTCTAC                     | GAGCTTGCAGAGCGAACTAT                           | RT-qPCR  |
| <i>AcJAZ3</i>  | TTGTAGCCTCTTGAGCCAATAC                    | CTCATTCGTCCCTTCCTTGTT                          | RT-qPCR  |
| <i>AcJAZ4</i>  | ACAAGGTGGGTCTCTCTCTAA                     | CAGCATTCTCTGAGGGTTTCT                          | RT-qPCR  |
| <i>AcJAZ5</i>  | GCAGCGGAAGCAAGTAATGGAG                    | CTCGCGATTGGCAGCTCTC                            | RT-qPCR  |
| <i>AcJAZ6</i>  | GGTTCGGTTCCATCCTCTTC                      | CGGTGCACCTTCCACTAAAC                           | RT-qPCR  |
| <i>AcJAZ7</i>  | TCTGCCTCCGACTTGGTAT                       | GATGGCTCTTGCCTGAATCT                           | RT-qPCR  |
| <i>AcJAZ8</i>  | CTCGGTCACCCCCGAAAAG                       | GAGGGCTACCTCCTTGCGAAC                          | RT-qPCR  |
| <i>AcJAZ9</i>  | GCAGCAGCAACAGCAGCAGC                      | CATTTCTCGTCTCGCCATCGATA                        | RT-qPCR  |
| <i>AcJAZ10</i> | CGATTCGCTCTTCGACTCATC                     | CACACCTCCCAACAGTAATAG                          | RT-qPCR  |
| <i>AcJAZ11</i> | AGGGCATTGAGAGGTACGA                       | ACTCTGTGCGGCAAGTTTAT                           | RT-qPCR  |
| <i>AcJAZ12</i> | CTCCGTTTCCCCCGAAAAG                       | CTACCTGAGAGCAACCTCCTTCC                        | RT-qPCR  |
| <i>AcJAZ13</i> | GGTAAGGTCGAGGAATTGATGCG                   | CTTTCCTCCTTTTCGCGAGG                           | RT-qPCR  |
| <i>AcJAZ14</i> | CAGCAGCAGCAGCAGCGGG                       | CTCCATTTCTCGCTCGCCATC                          | RT-qPCR  |
| <i>AcPP2A</i>  | TTGTCATCGCTTCCTCCAAG                      | GTGTTGTCCACCACAGTATGA                          | RT-qPCR  |
| <i>AcJAZ4</i>  | cacgggggactctagaATGGAGCGGGATTTTTT<br>GGG  | tcccgggagcggtaccTTAGAGAGAGAGA<br>TGGAGAGAGAGAG | BiFC     |
| <i>AcJAZ5</i>  | cacgggggactctagaATGTGAAGGCCGCCGC<br>C     | tcccgggagcggtaccTTAGGTGGTCAACC<br>TTTCCTTGCGCC | BiFC     |
| <i>AcJAZ13</i> | cacgggggactctaga<br>ATGGAGAGGGAAAAAACCAAC | tcccgggagcggtacc<br>CTACAAACGAAGCTCATGTTC      | BiFC     |
| <i>AcMYC2</i>  | cacgggggactctaga<br>ATGATGGAGGCCTTCATG    | tcccgggagcggtacc<br>CTACCTGCAAGGAGAGGG         | BiFC     |
| <i>AcNINJA</i> | cacgggggactctaga<br>ATGGAGGACGAAAATGGCCTC | tcccgggagcggtaccGTTTTGGGCCGATG<br>CTGCTG       | BiFC     |
| <i>AcJAM1</i>  | cacgggggactctaga<br>ATGGTGATGGGGAGGCTATG  | tcccgggagcggtaccCTGCGACTGGGACT<br>GCGAC        | BiFC     |

Table S2. Prediction of subcellular localization of AcJAZ proteins

| AcJAZs  | DeepLoc analysis: scores |           |          |            | Prediction | MULocDeep analysis: scores |           |          |            | Prediction |
|---------|--------------------------|-----------|----------|------------|------------|----------------------------|-----------|----------|------------|------------|
|         | Nucleus                  | Cytoplasm | Membrane | Peroxisome |            | Nucleus                    | Cytoplasm | Membrane | Peroxisome |            |
| AcJAZ1  | 0.5712                   | 0.0113    | 0.0385   | 0.2126     | Nucleus    | 0.8517                     | 0.1329    | 0.0024   | 0.0024     | Nucleus    |
| AcJAZ2  | 0.9938                   | 0.0061    | 0        | 0          | Nucleus    | 0.7764                     | 0.0575    | 0.0022   | 0.0018     | Nucleus    |
| AcJAZ3  | 0.6793                   | 0.0101    | 0.0779   | 0.1179     | Nucleus    | 0.7206                     | 0.0926    | 0.0011   | 0.0019     | Nucleus    |
| AcJAZ4  | 0.8810                   | 0.0103    | 0.0929   | 0.0027     | Nucleus    | 0.5278                     | 0.1691    | 0.0045   | 0.0018     | Nucleus    |
| AcJAZ5  | 0.9470                   | 0.0397    | 0.0102   | 0.0005     | Nucleus    | 0.7679                     | 0.0023    | 0.001    | 0.0051     | Nucleus    |
| AcJAZ6  | 0.9894                   | 0.0103    | 0.0002   | 0          | Nucleus    | 0.8423                     | 0.1112    | 0.0019   | 0.0016     | Nucleus    |
| AcJAZ7  | 0.9908                   | 0.009     | 0.0001   | 0          | Nucleus    | 0.8001                     | 0.1192    | 0.0022   | 0.0021     | Nucleus    |
| AcJAZ8  | 0.9970                   | 0.0427    | 0.0002   | 0          | Nucleus    | 0.8963                     | 0.0418    | 0.0026   | 0.0019     | Nucleus    |
| AcJAZ9  | 0.9951                   | 0.0022    | 0.002    | 0.0001     | Nucleus    | 0.7391                     | 0.1236    | 0.0019   | 0.0018     | Nucleus    |
| AcJAZ10 | 0.9929                   | 0.0069    | 0.0001   | 0          | Nucleus    | 0.4406                     | 0.0091    | 0.0021   | 0.0015     | Nucleus    |
| AcJAZ11 | 0.9998                   | 0.0002    | 0        | 0          | Nucleus    | 0.7853                     | 0.1372    | 0.0042   | 0.0019     | Nucleus    |
| AcJAZ12 | 0.9999                   | 0.0001    | 0        | 0          | Nucleus    | 0.8354                     | 0.041     | 0.0424   | 0.0024     | Nucleus    |
| AcJAZ13 | 0.8363                   | 0.0509    | 0.0584   | 0.0059     | Nucleus    | 0.5198                     | 0.0331    | 0.0025   | 0.0074     | Nucleus    |
| AcJAZ14 | 0.9921                   | 0.0025    | 0.0036   | 0.0001     | Nucleus    | 0.9323                     | 0.0292    | 0.0043   | 0.0018     | Nucleus    |

Table S3. Prediction of subcellular localization of OsJAZ proteins.

| OsJAZs  | DeepLoc analysis: scores |           |          |            | Prediction | MULocDeep analysis: scores |               |              |                   | Prediction    |
|---------|--------------------------|-----------|----------|------------|------------|----------------------------|---------------|--------------|-------------------|---------------|
|         | Nucleus                  | Cytoplasm | Membrane | Peroxisome |            | Nucleus                    | Cytopla<br>sm | Membr<br>ane | Mitocho<br>ndrion |               |
| OsJAZ1  | 0.9958                   | 0.004     | 0.0002   | 0.0001     | Nucleus    | 0.6839                     | 0.2866        | 0.0019       | 0.0037            | Nucleus       |
| OsJAZ2  | 0.9917                   | 0.008     | 0.0001   | 0.0001     | Nucleus    | 0.9943                     | 0.0395        | 0.0012       | 0.0016            | Nucleus       |
| OsJAZ3  | 0.9307                   | 0.065     | 0.0019   | 0.0008     | Nucleus    | 0.477                      | 0.2956        | 0.0179       | 0.0012            | Nucleus       |
| OsJAZ4  | 0.9754                   | 0.023     | 0.0003   | 0.0007     | Nucleus    | 0.1322                     | 0.6674        | 0.0077       | 0.0024            | Cytoplasm     |
| OsJAZ5  | 0.7923                   | 0.196     | 0.0038   | 0.0022     | Nucleus    | 0.7517                     | 0.1888        | 0.001        | 0.0022            | Nucleus       |
| OsJAZ6  | 0.9861                   | 0.014     | 0        | 0.0001     | Nucleus    | 0.793                      | 0.0267        | 0.0017       | 0.0065            | Nucleus       |
| OsJAZ7  | 0.9360                   | 0.029     | 0.0105   | 0.0132     | Nucleus    | 0.7086                     | 0.0904        | 0.0009       | 0.1257            | Nucleus       |
| OsJAZ8  | 0.8515                   | 0.046     | 0.0312   | 0.0357     | Nucleus    | 0.4382                     | 0.374         | 0.001        | 0.093             | Nucleus       |
| OsJAZ9  | 0.9799                   | 0.017     | 0.0007   | 0.0019     | Nucleus    | 0.3738                     | 0.3097        | 0.0009       | 0.0108            | Nucleus       |
| OsJAZ10 | 0.7663                   | 0.174     | 0.0369   | 0.0024     | Nucleus    | 0.2317                     | 0.2242        | 0.0036       | 0.3879            | Mitochondrion |
| OsJAZ11 | 0.7008                   | 0.275     | 0.0108   | 0.0011     | Nucleus    | 0.5993                     | 0.2065        | 0.0009       | 0.0037            | Nucleus       |
| OsJAZ12 | 0.6676                   | 0.1444    | 0.0896   | 0.0215     | Nucleus    | 0.3619                     | 0.1213        | 0.0017       | 0.1828            | Nucleus       |
| OsJAZ13 | 0.9643                   | 0.024     | 0.0052   | 0.0018     | Nucleus    | 0.1703                     | 0.0196        | 0.0015       | 0.2418            | Mitochondrion |
| OsJAZ14 | 0.7302                   | 0.207     | 0.0224   | 0.021      | Nucleus    | 0.3191                     | 0.2839        | 0.0014       | 0.035             | Nucleus       |
| OsJAZ15 | 0.9984                   | 0.001     | 0.0001   | 0.0001     | Nucleus    | 0.7406                     | 0.0087        | 0.0008       | 0.0163            | Nucleus       |

**Table S4.** The *cis*-acting abiotic responsive elements in Pineapple *JAZ* genes.

| Gene<br>name   | Abiotic responsive elements |                   |                  |                  |                  |                   |                   |                   |                   |                       |
|----------------|-----------------------------|-------------------|------------------|------------------|------------------|-------------------|-------------------|-------------------|-------------------|-----------------------|
|                | ABRE <sup>1</sup>           | MeJA <sup>2</sup> | WRE <sup>3</sup> | ERE <sup>4</sup> | DRE <sup>5</sup> | SARE <sup>6</sup> | LTRE <sup>7</sup> | GIRE <sup>8</sup> | AURE <sup>9</sup> | TC-rich <sup>10</sup> |
| <i>AcJAZ1</i>  | 14                          | 4                 | 3                | 4                | 0                | 2                 | 0                 | 1                 | 0                 | 0                     |
| <i>AcJAZ2</i>  | 2                           | 6                 | 3                | 3                | 0                | 0                 | 2                 | 0                 | 0                 | 0                     |
| <i>AcJAZ3</i>  | 12                          | 4                 | 2                | 2                | 0                | 0                 | 1                 | 0                 | 0                 | 1                     |
| <i>AcJAZ4</i>  | 13                          | 4                 | 1                | 2                | 1                | 0                 | 0                 | 0                 | 0                 | 0                     |
| <i>AcJAZ5</i>  | 12                          | 4                 | 4                | 2                | 0                | 0                 | 0                 | 1                 | 1                 | 0                     |
| <i>AcJAZ6</i>  | 4                           | 4                 | 4                | 26               | 0                | 0                 | 2                 | 0                 | 0                 | 0                     |
| <i>AcJAZ7</i>  | 15                          | 2                 | 4                | 1                | 1                | 1                 | 1                 | 1                 | 0                 | 0                     |
| <i>AcJAZ8</i>  | 5                           | 2                 | 1                | 1                | 0                | 0                 | 4                 | 2                 | 0                 | 0                     |
| <i>AcJAZ9</i>  | 10                          | 4                 | 2                | 4                | 1                | 1                 | 0                 | 0                 | 0                 | 0                     |
| <i>AcJAZ10</i> | 3                           | 4                 | 3                | 0                | 5                | 3                 | 0                 | 0                 | 1                 | 0                     |
| <i>AcJAZ11</i> | 0                           | 4                 | 3                | 0                | 0                | 0                 | 0                 | 0                 | 1                 | 0                     |
| <i>AcJAZ12</i> | 4                           | 8                 | 2                | 23               | 0                | 1                 | 1                 | 0                 | 0                 | 0                     |
| <i>AcJAZ13</i> | 1                           | 2                 | 4                | 2                | 0                | 1                 | 0                 | 1                 | 0                 | 1                     |
| <i>AcJAZ14</i> | 9                           | 2                 | 0                | 3                | 1                | 0                 | 0                 | 0                 | 0                 | 0                     |

Note: <sup>1</sup>Abscisic acid responsive elements; <sup>2</sup>MeJA-responsive elements; <sup>3</sup>Wound responsive elements; <sup>4</sup>Ethylene responsive elements; <sup>5</sup>Drought responsive elements; <sup>6</sup>Salicylic responsive elements; <sup>7</sup>Low-temperature responsive elements; <sup>8</sup>Gibberellin-responsive elements; <sup>9</sup>Auxin-responsive elements; <sup>10</sup>Defense and stress responsive elements.

**Table S5.** *MYC2* genes in pineapple

| No. | Gene ID     | Bit score | E-value   |
|-----|-------------|-----------|-----------|
| 1   | Aco018875.1 | 498       | 5.00E-169 |
| 2   | Aco018208.1 | 158       | 3.00E-42  |
| 3   | Aco026873.1 | 137       | 8.00E-38  |
| 4   | Aco010845.1 | 135       | 2.00E-33  |
| 5   | Aco005839.1 | 122       | 1.00E-29  |
| 6   | Aco030901.1 | 103       | 3.00E-23  |
| 7   | Aco007275.1 | 102       | 9.00E-23  |
| 8   | Aco012028.1 | 92        | 2.00E-19  |
| 9   | Aco029228.1 | 82        | 4.00E-17  |

**Table S6.** *JAM1* genes in pineapple.

| No. | Gene ID     | Bit score | E-value  |
|-----|-------------|-----------|----------|
| 1   | Aco005839.1 | 186       | 3.00e-51 |
| 2   | Aco030901.1 | 84.3      | 4.00e-17 |
| 3   | Aco007275.1 | 83.6      | 8.00e-17 |
| 4   | Aco000272.1 | 82.4      | 4.00e-17 |
| 5   | Aco015882.1 | 81.6      | 6.00e-17 |
| 6   | Aco002246.1 | 80.5      | 1.00e-16 |
| 7   | Aco031432.1 | 79.3      | 2.00e-16 |
| 8   | Aco022880.1 | 77        | 8.00e-15 |

**Table S7.** *NINJA* genes in pineapple.

| No. | Gene ID     | Bit score | E-value |
|-----|-------------|-----------|---------|
| 1   | Aco006735.1 | 210       | 8e-62   |
| 2   | Aco017364.1 | 72.0      | 5e-14   |
| 3   | Aco012414.1 | 66.2      | 7e-12   |
| 4   | Aco003903.1 | 63.5      | 3e-11   |
| 5   | Aco004854.1 | 60.5      | 4e-10   |

**Table S8. BiFC identification of protein-protein interactions among central regulators of the JA-signaling pathway in pineapple.**

| <div>-YFP<sup>N</sup> \ -YFP<sup>C</sup></div> | YFP <sup>C</sup> | AcJAZ4 | AcJAZ5 | AcJAZ11 | AcJAZ13 |
|------------------------------------------------|------------------|--------|--------|---------|---------|
| YFP <sup>N</sup>                               | -                | -      | -      | -       | -       |
| AcMYC2                                         | -                | -      | +      | -       | +       |
| AcNINJA                                        | -                | -      | +      | -       | +       |
| AcJAZ4                                         | -                |        | +      | -       | +       |
| AcJAM1                                         | -                | -      | +      | -       | +       |

**Note:** “+” means detected fluorescence signal from the protein-protein interaction by BiFC analysis; “-” represents no fluorescence signal detected from the vector pairs.

(a)

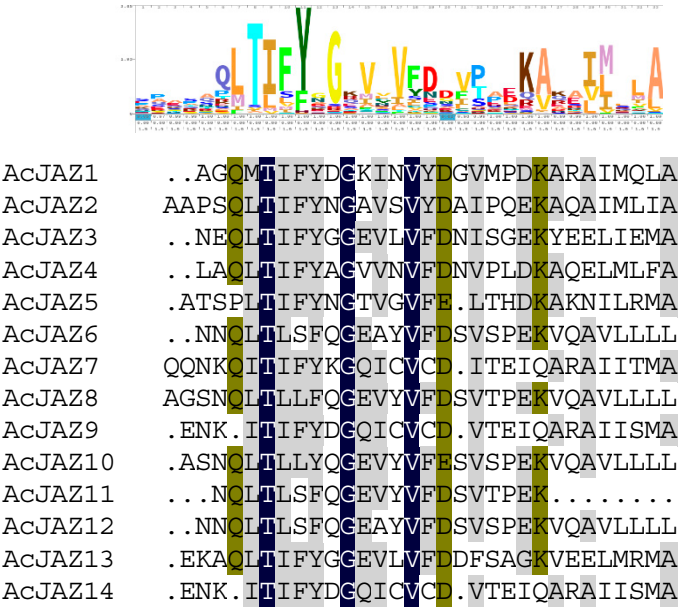

(b)

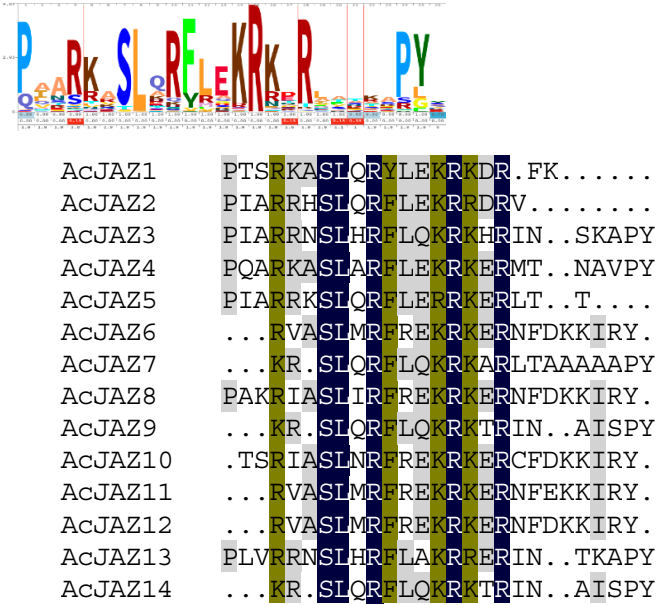

**Figure S1.** The alignment of 14 AcJAZ proteins showed the tify motif and Jas domain. (a) tify motif. (b) Jas domain.



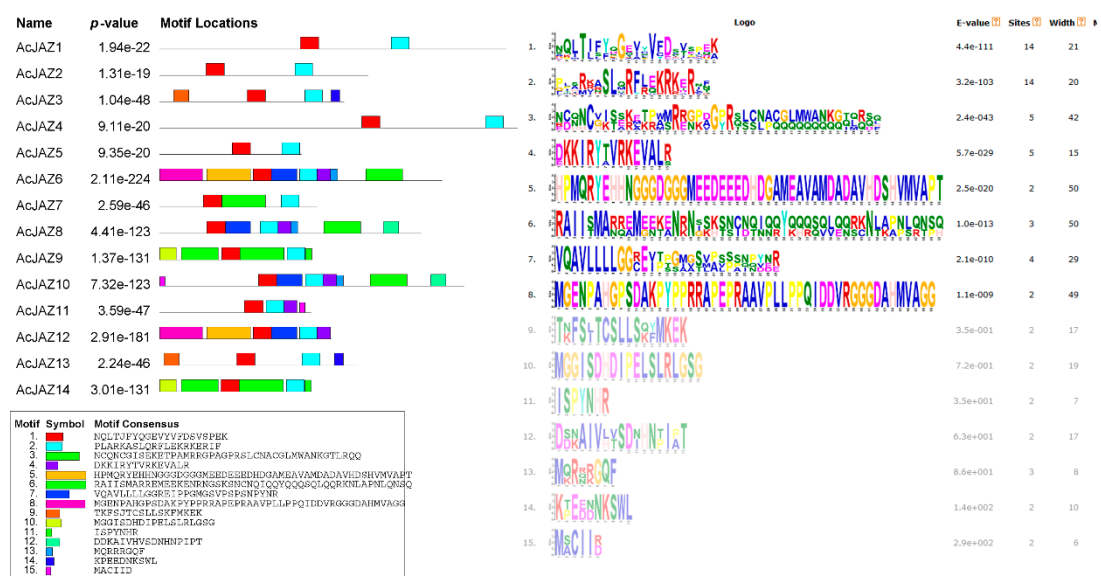

**Figure S2.** Motif logos of AcJAZs. The height of letters within the logos represents the relative frequency of the specific amino acids.

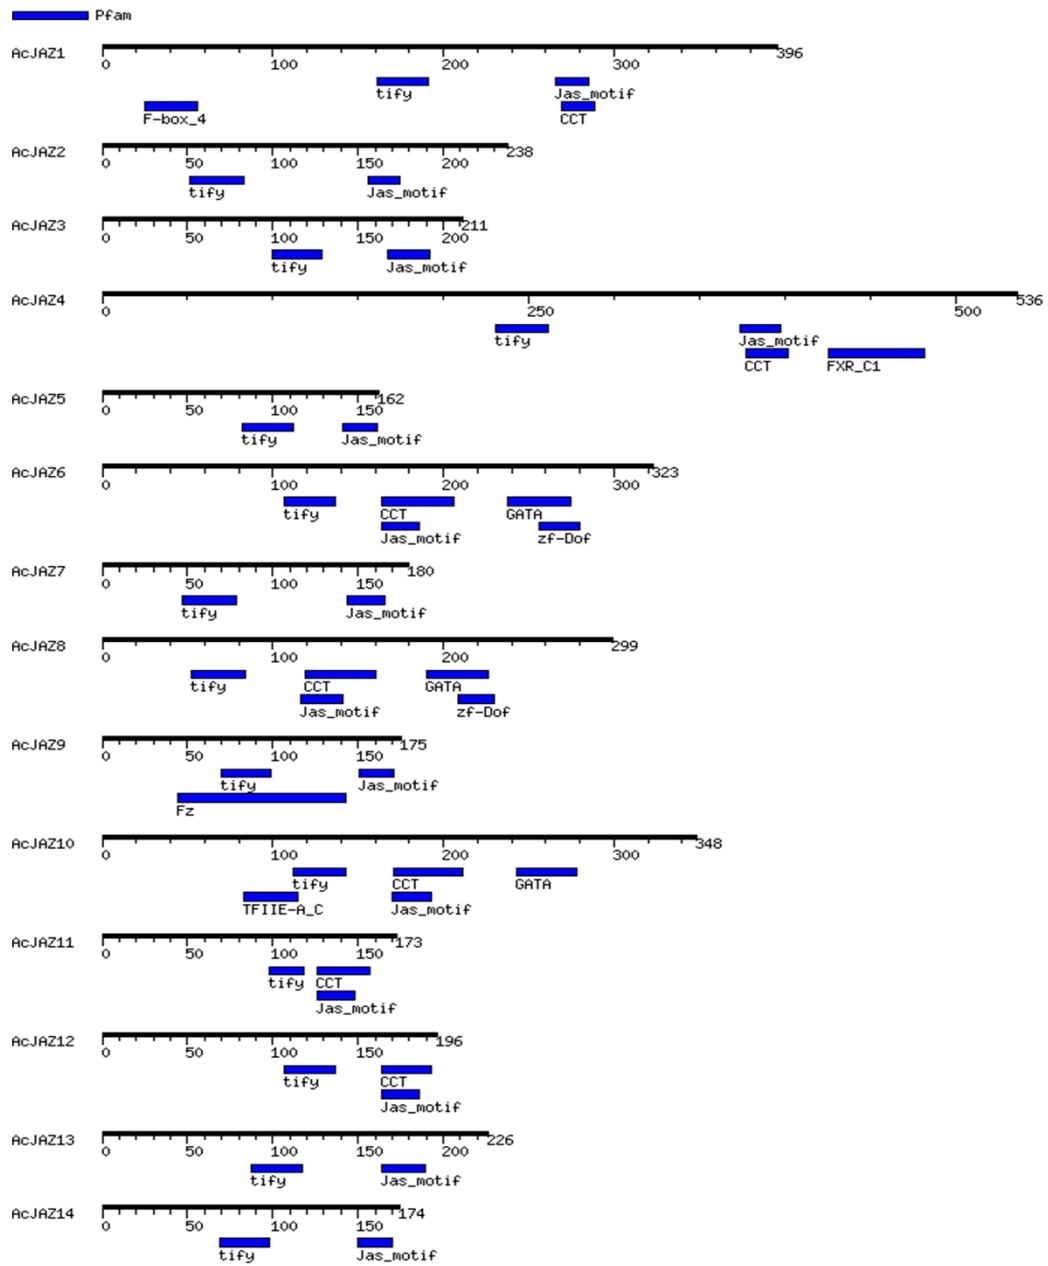

**Figure S3.** Motifs in AcJAZ identified by Pfam.

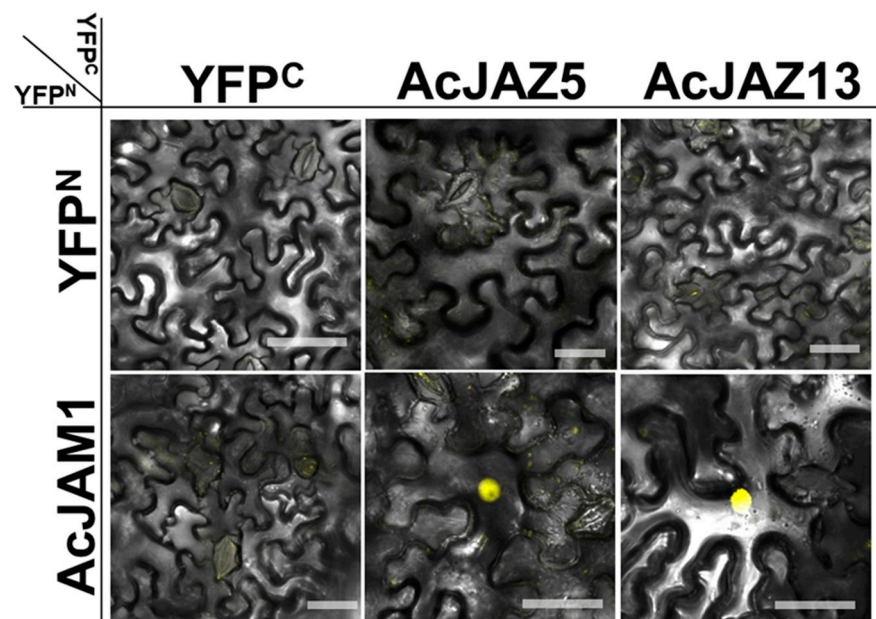

**Figure S4.** The protein-protein interactions among central regulators of the JA-signaling pathway in pineapple (continued).  
Bar=50μm.
